# Supplementary material
Source: PubMed Central journal article supplement (PMC4097783)
Supplement: JVI.00473-14_zjv999099190so1.pdf [file JVI.00473-14_zjv999099190so1.pdf]

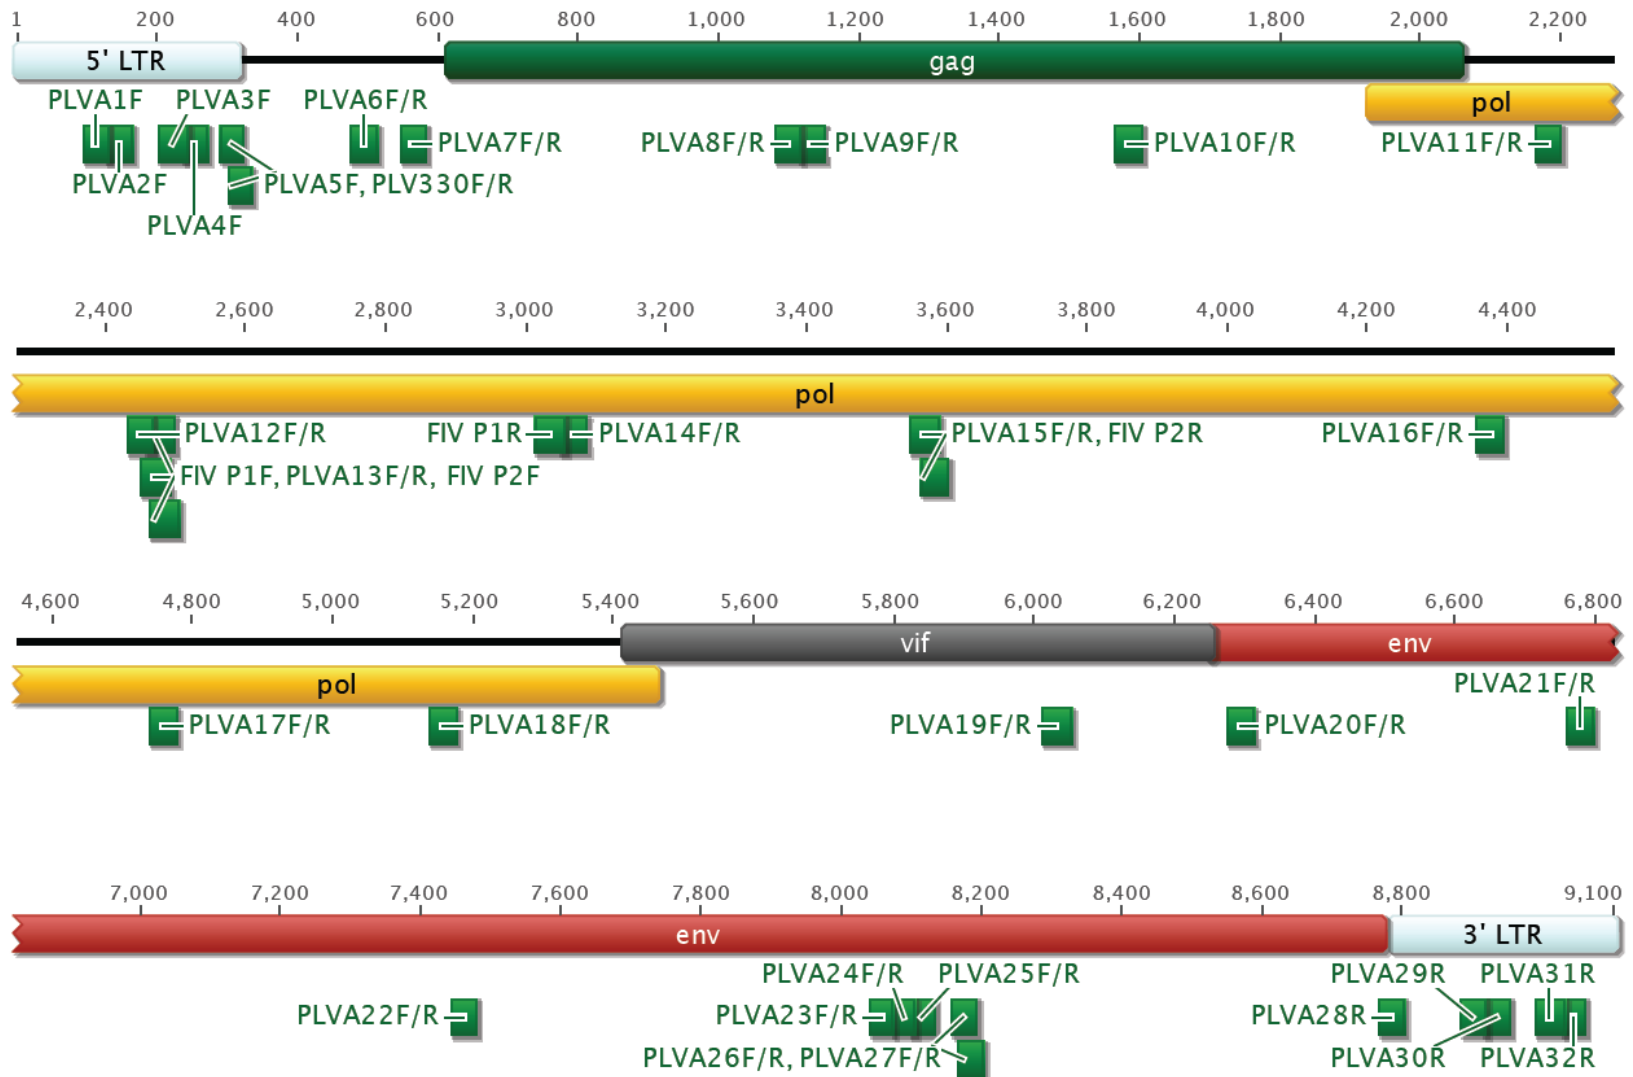

Figure A1a: PLVA and PLVB primer maps showing the location of the primers (small green boxes) utilized in this study. Each figure is annotated with the location of the 5'- and 3'- long terminal repeats (LTR) and open reading frames (*gag*, *pol*, *vif*, *OrfA* (PLVB only) and *env*). Primer sequences and genome coordinates are listed in Table A2.

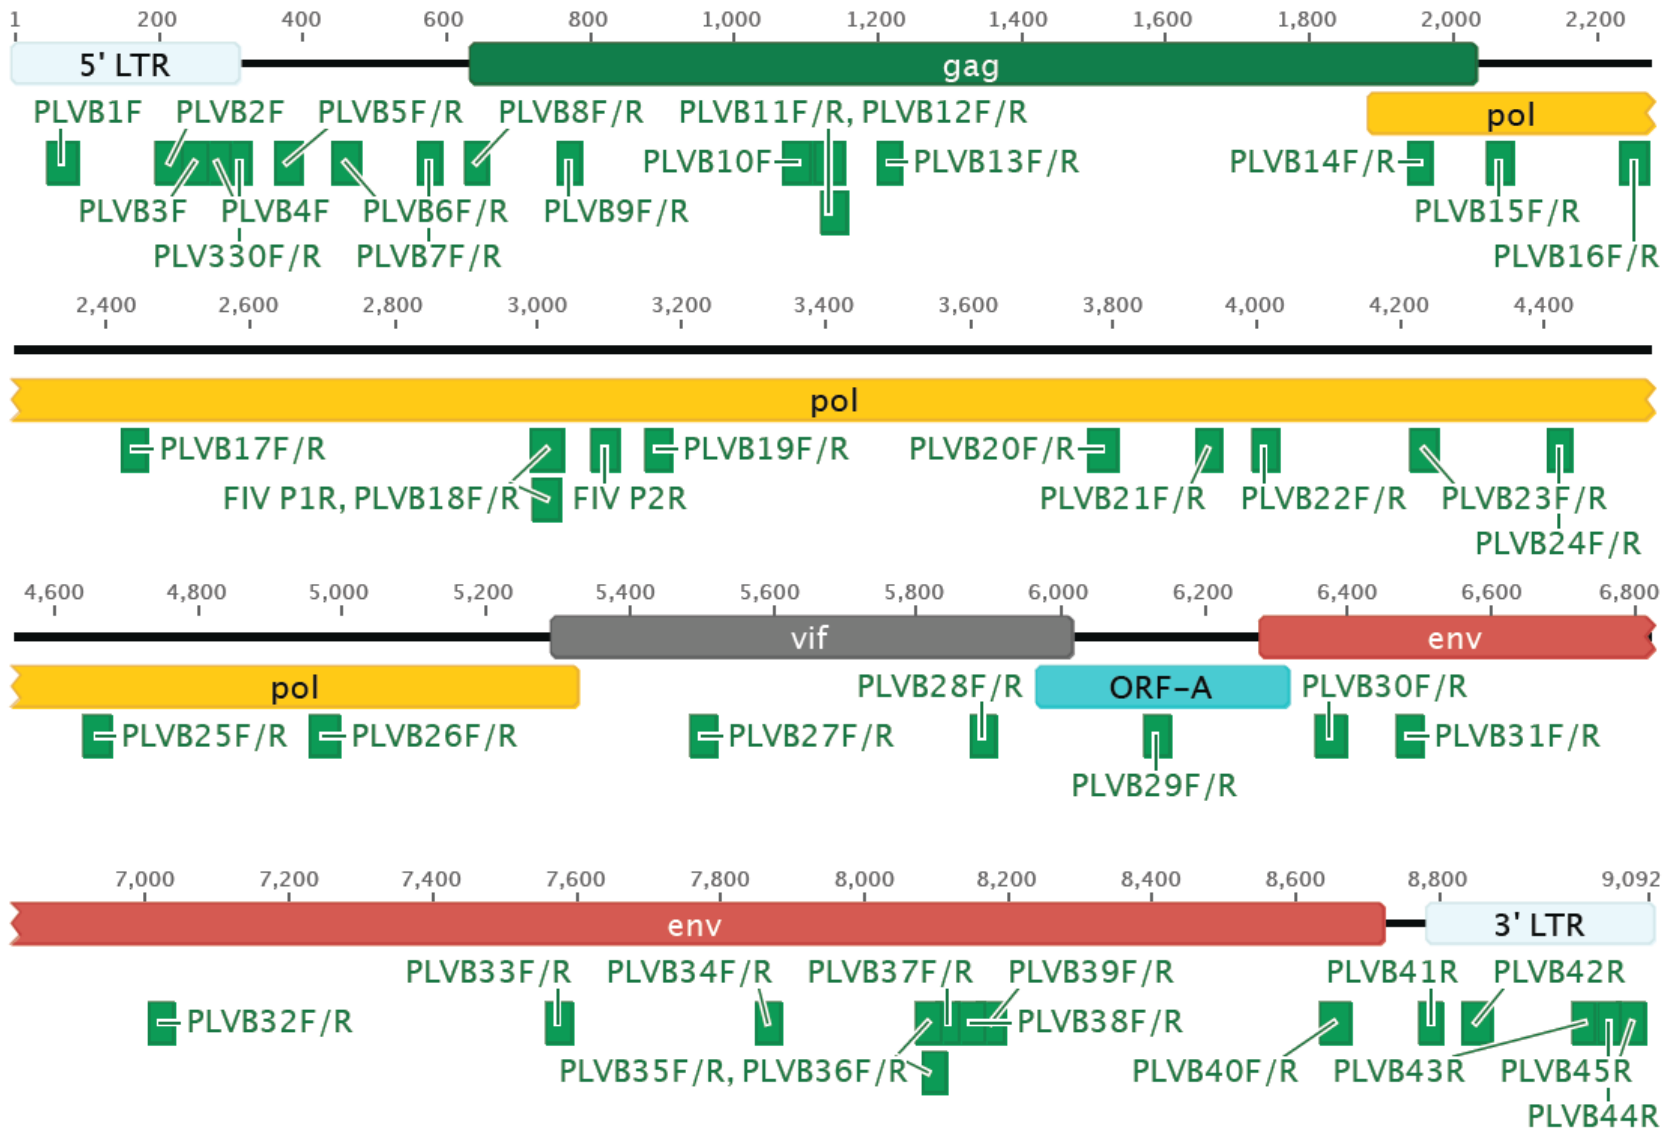

Figure A1b

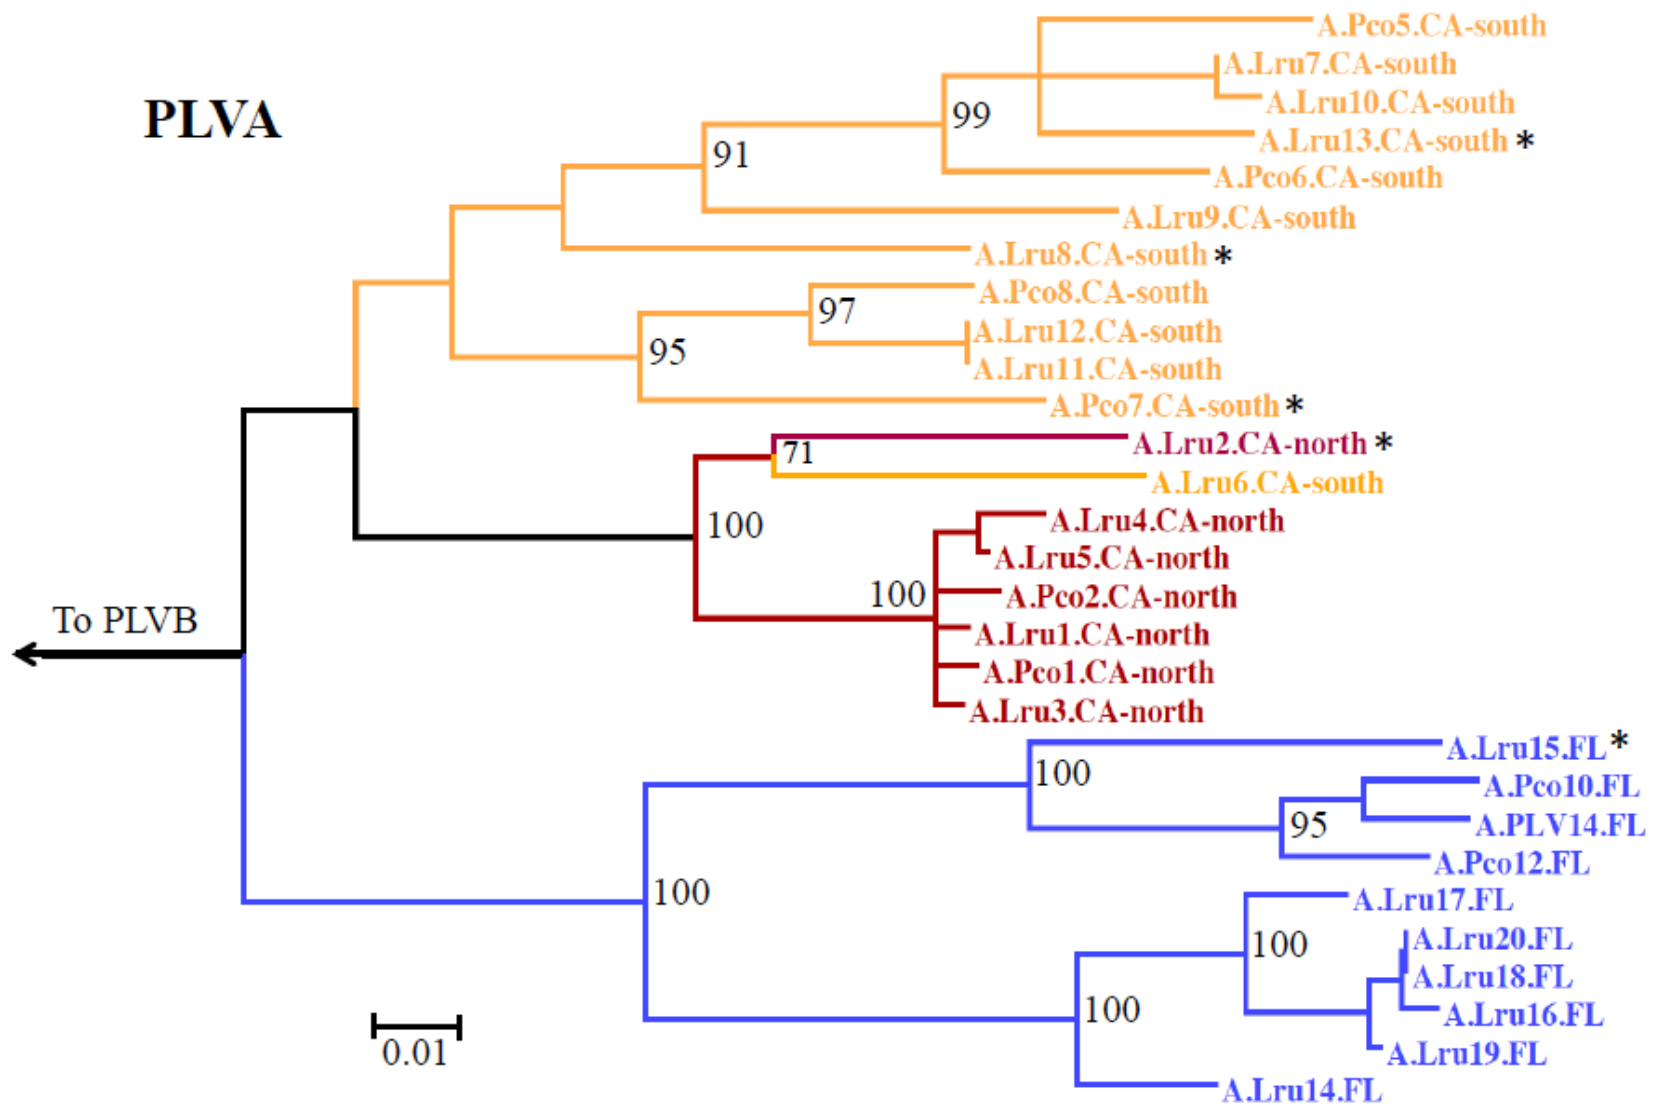

Figure A2a: Phylogenetic trees depicting alternative evolutionary histories of genomic regions resulting from recombination between isolates from different viral lineages. Neighbor-joining trees were constructed from all non-recombinant genome regions (Figure 4). One tree from each clade is presented here to illustrate the effect of recombination on viral genetic diversity. The trees represent the

following genome regions: PLVA – *gag* 905-1368 (520bp); PLVB – *env* 6529 – 7122 (620bp). Bootstrap values estimated from 1000 replicates are labeled on nodes with greater than 70% cluster support. Isolates labeled with \* are likely recombinant viruses because their position on this tree is incongruent (supported by bootstrap values > 70) with their position in Figure 2.

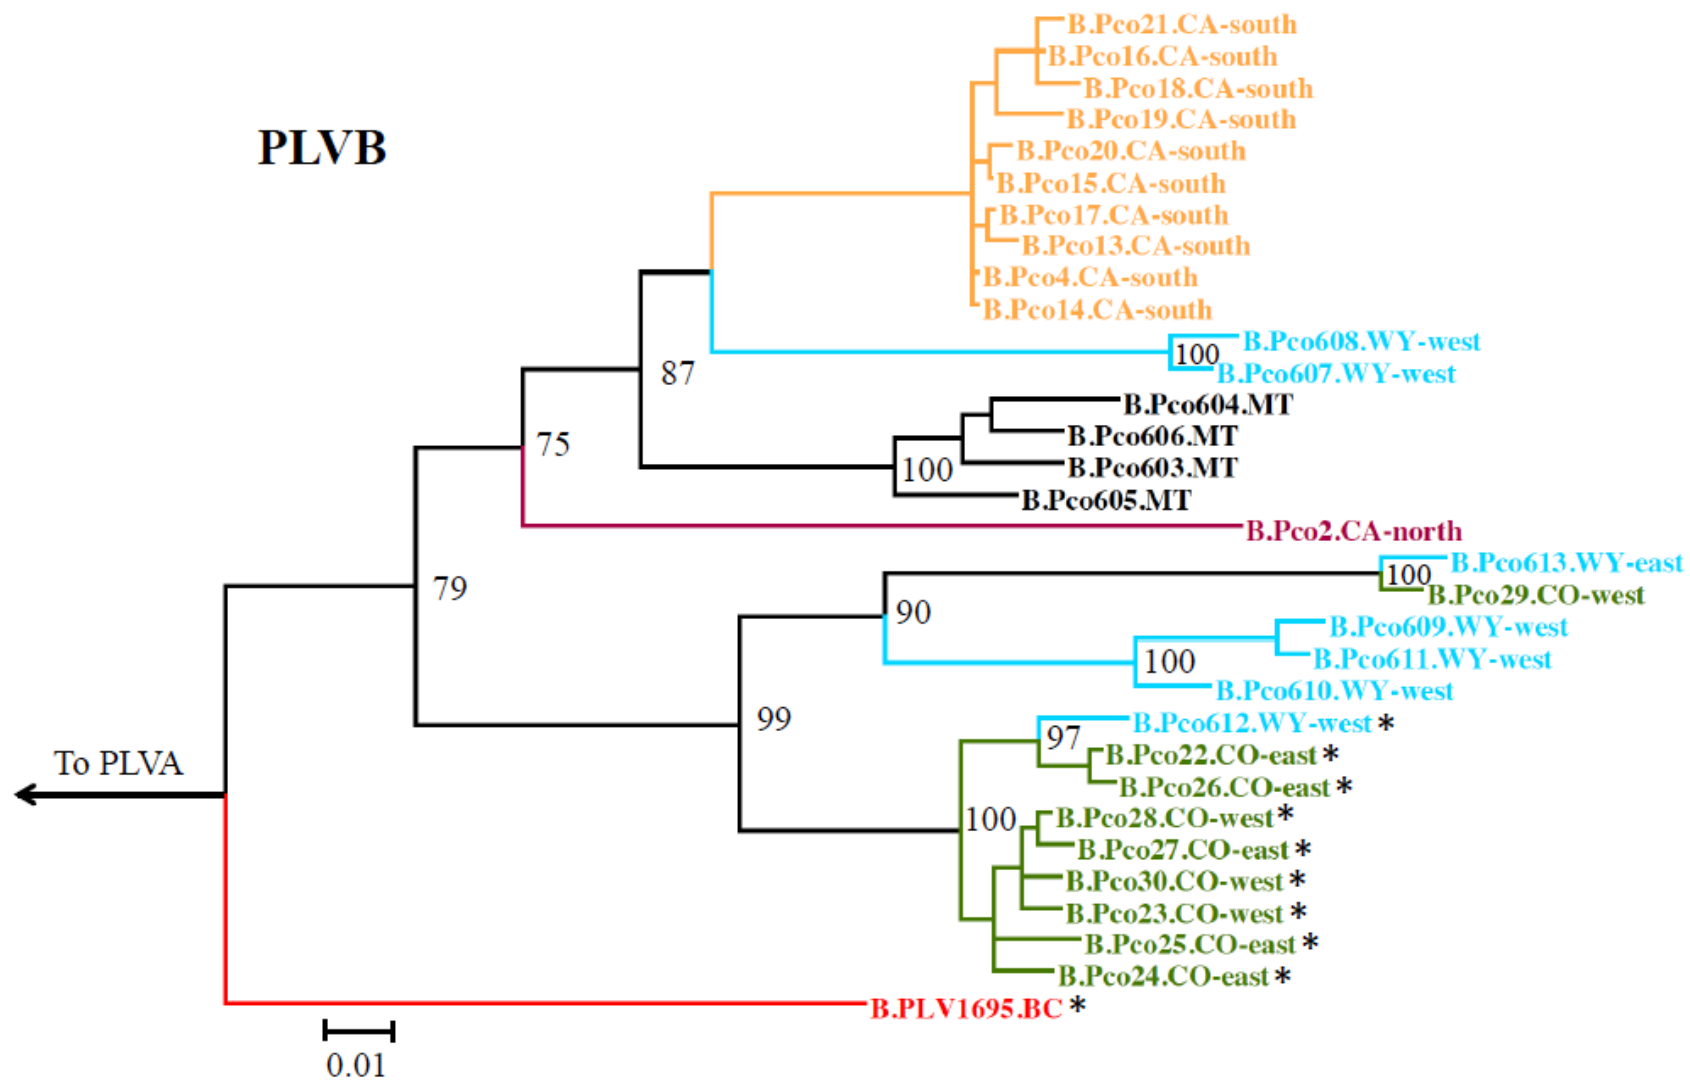

Figure A2b

Table A1: Demographic information for all bobcat (Lru) and puma (Pco) samples included in this study. GenBank accession numbers for previously published sequences are shown in parentheses.

| <b>PLVA Isolates</b>                                |                 |                       |            |            |  |
|-----------------------------------------------------|-----------------|-----------------------|------------|------------|--|
| <b>Isolate Identifier</b>                           | <b>Location</b> | <b>Year Collected</b> | <b>Sex</b> | <b>Age</b> |  |
| Lru1                                                | CA-north        | 1996                  | M          | A          |  |
| Lru2                                                | CA-north        | 2001                  | M          | A          |  |
| Lru3                                                | CA-north        | 2001                  | M          | A          |  |
| Lru4                                                | CA-north        | 2002                  | M          | A          |  |
| Lru5                                                | CA-north        | 2002                  | F          | Y          |  |
| Lru6                                                | CA-south        | 2003                  | M          | A          |  |
| Lru7                                                | CA-south        | 2005                  | M          | A          |  |
| Lru8                                                | CA-south        | 2006                  | M          | A          |  |
| Lru9                                                | CA-south        | 2007                  | M          | A          |  |
| Lru10                                               | CA-south        | 2006                  | M          | A          |  |
| Lru11                                               | CA-south        | 2009                  | M          | A          |  |
| Lru12                                               | CA-south        | 2009                  | F          | A          |  |
| Lru13                                               | CA-south        | 2009                  | M          | A          |  |
| Lru14                                               | FL              | 1984                  | -          | -          |  |
| Lru15                                               | FL              | 2007                  | F          | A          |  |
| Lru16                                               | FL              | 2010                  | M          | A          |  |
| Lru17                                               | FL              | 2010                  | M          | A          |  |
| Lru18                                               | FL              | 2010                  | M          | A          |  |
| Lru19                                               | FL              | 2010                  | M          | A          |  |
| Lru20                                               | FL              | 2010                  | M          | A          |  |
| Pco1                                                | CA-north        | 2004                  | F          | A          |  |
| Pco2*§                                              | CA-north        | 2002                  | M          | A          |  |
| Pco3*                                               | CA-north        | 2009                  | M          | A          |  |
| Pco4*§                                              | CA-south        | 2006                  | M          | A          |  |
| Pco5                                                | CA-south        | 2004                  | F          | A          |  |
| Pco6                                                | CA-south        | 2003                  | M          | A          |  |
| Pco7                                                | CA-south        | 2004                  | F          | A          |  |
| Pco8                                                | CA-south        | 2002                  | F          | A          |  |
| Pco9*                                               | CA-south        | 2010                  | M          | A          |  |
| Pco10*                                              | FL              | 1991                  | -          | -          |  |
| Pco11*                                              | FL              | 1987                  | -          | -          |  |
| Pco12*                                              | FL              | 1991                  | -          | -          |  |
| PLV14 (U03982)                                      | FL              | 1991                  | -          | -          |  |
| * - only a portion of the PLVA genome was sequenced |                 |                       |            |            |  |
| § - co-infected with both PLVA and PLVB viruses     |                 |                       |            |            |  |

Table A1 continued

| <b>PLVB Isolates</b>                            |                 |                       |            |            |  |
|-------------------------------------------------|-----------------|-----------------------|------------|------------|--|
| <b>Isolate Identifier</b>                       | <b>Location</b> | <b>Year Collected</b> | <b>Sex</b> | <b>Age</b> |  |
| Pco2§                                           | CA-north        | 2002                  | M          | A          |  |
| Pco4§                                           | CA-south        | 2006                  | M          | A          |  |
| Pco13                                           | CA-south        | 2005                  | F          | A          |  |
| Pco14                                           | CA-south        | 2002                  | F          | A          |  |
| Pco15                                           | CA-south        | 2002                  | M          | A          |  |
| Pco16                                           | CA-south        | 2011                  | M          | -          |  |
| Pco17                                           | CA-south        | 2003                  | M          | A          |  |
| Pco18                                           | CA-south        | 2002                  | F          | A          |  |
| Pco19                                           | CA-south        | 2003                  | F          | A          |  |
| Pco20                                           | CA-south        | 2003                  | F          | A          |  |
| Pco21                                           | CA-south        | 2003                  | F          | A          |  |
| Pco22                                           | CO-east         | 2009                  | M          | A          |  |
| Pco23                                           | CO-west         | 2010                  | F          | A          |  |
| Pco24                                           | CO-east         | 2010                  | F          | Y          |  |
| Pco25                                           | CO-east         | 2010                  | F          | A          |  |
| Pco26                                           | CO-east         | 2010                  | F          | A          |  |
| Pco27                                           | CO-east         | 2008                  | F          | A          |  |
| Pco28                                           | CO-west         | 2009                  | M          | A          |  |
| Pco29                                           | CO-west         | 2009                  | F          | A          |  |
| Pco30                                           | CO-west         | 2009                  | M          | A          |  |
| PLV1695 (DQ192583)                              | BC              | 1995                  | -          | -          |  |
| Pco603 (EF455603)                               | MT              | 2001                  | -          | -          |  |
| Pco604 (EF455604)                               | MT              | 2002                  | -          | -          |  |
| Pco605 (EF455605)                               | MT              | 2001                  | -          | -          |  |
| Pco606 (EF455606)                               | MT              | 2001                  | -          | -          |  |
| Pco607 (EF455607)                               | WY-west         | 1992                  | -          | -          |  |
| Pco608 (EF455608)                               | WY-west         | 1992                  | -          | -          |  |
| Pco609 (EF455609)                               | WY-west         | 2004                  | -          | -          |  |
| Pco610 (EF455610)                               | WY-west         | 2003                  | -          | -          |  |
| Pco611(EF455611)                                | WY-west         | 2001                  | -          | -          |  |
| Pco612 (EF455612)                               | WY-west         | 2001                  | -          | -          |  |
| Pco613 (EF455613)                               | WY-east         | 2001                  | -          | -          |  |
| § - co-infected with both PLVA and PLVB viruses |                 |                       |            |            |  |

Table A2: PCR primers used to amplify and sequence PLVA and PLVB isolates. Primer sequences are listed in the 5'- to 3'- direction. The location of the 5'- base (forward primers) or 3'-base (reverse primers) is listed relative to the reference sequence for each clade (PLV14 – PLVA; PLV1695 - PLVB). Primers denoted with 1 and 2 were originally published in (4) and (1) respectively. All other primers were designed in this study.

| <b>PLVA</b>   |                                            |                 |
|---------------|--------------------------------------------|-----------------|
| <u>Primer</u> | <u>Sequence</u>                            | <u>Location</u> |
| PLVA1F        | AAC TAG CTT AAC CGY AAA CCG CA             | 100             |
| PLVA2F        | CCA CAT CCT ATA GAA ATG ACA AWA AGA        | 131             |
| PLVA3F        | AGA TCC TCA GGT ATG CTT TAA TAA AGA G      | 208             |
| PLVA4F        | GTG AAC CTT GGT GGC TGC CTG                | 241             |
| PLVA5F        | GGC CAG AAA CYC TGC AGT TGG                | 296             |
| PLVA6F        | GCT TGG TTG AAG AGA TAC AAA CTG            | 482             |
| PLVA6R        | CAG TTT GTA TCT CTT CAA CCA AGC            |                 |
| PLVA7F        | TAG GTT CTC AAG CGG GAC ACC A              | 554             |
| PLVA7R        | TGG TGT CCC GCT TGA GAA CCT A              |                 |
| PLVA8F        | GAT GGA AAA RGC TAG AGG AGG                | 1089            |
| PLVA8R        | CCT CCT CTA GCY TTT TCC ATC                |                 |
| PLVA9F        | GAR GAA GCA GTN TTA TGG TTT ACT G          | 1123            |
| PLVA9R        | AGT AAA CCA TAA GAC TGC TTC                |                 |
| PLVA10F       | AAT GCW AAT GGR GAG TGT AGA ARR GC         | 1573            |
| PLVA10R       | GCY YTT CTA CAC TCY CCA TTW GCA TT         |                 |
| PLVA11F       | GGG GAA TAG TAT ATT TGA TGG ATA TCA        | 2172            |
| PLVA11R       | GGG GTG ATA TCC ATC AAA TAT ACT ATT        |                 |
| PLVA12F       | GGC CAT TGT TTT ATT TGA GGN CC             | 2439            |
| PLVA12R       | GGN CCT CAA ATA AAA CAA TGG CC             |                 |
| PLVA13F       | TTC WGT AAR AGC TTC TAT YTT TTC ATT WGT TA | 2464            |
| PLVA13R       | CAA ATG AAA AAA TAG AAG CTT TAA C          |                 |
| PLVA14F       | GAA CCY CCY TAT AAR TGG ATG GGA TAT        | 3054            |
| PLVA14R       | ATA TCC CAT CCA TTT ATA GGG RGG TTC        |                 |
| PLVA15F       | GGN TRG GAA GRA TGA ATA GRC AAA AGA ARA    | 3553            |
| PLVA15R       | TYT TCT TTT GYC TAT TCA TYC TTC CYA NCC    |                 |
| PLVA16F       | TTA GGA GGW GTA ATT GAT CAA GGA T          | 4362            |
| PLVA16R       | ATC CTT GAT CAA TTA CWC CTC CTA A          |                 |
| PLVA17F       | TAA ART TAG GWG AAG GDA TAT GGC ARA T      | 4744            |
| PLVA17R       | ATY TGC CAT ATH CCT TCW CCT AAY TTT A      |                 |



Table A2 Continued

| <b>PLVA (continued)</b> |                                       |                 |
|-------------------------|---------------------------------------|-----------------|
| <u>Primer</u>           | <u>Sequence</u>                       | <u>Location</u> |
| PLVA18F                 | GAA AGG GTG GAT TAG GGG GTA TYA CAC   | 5143            |
| PLVA18R                 | GTG TRA TAC CCC CTA ATC CAC CCT TTC   |                 |
| PLVA19F                 | CWT GGG AWT ATT GTG GAG ATT GTT GG    | 6919            |
| PLVA19R                 | CCA ACA ATC TCC ACA ATA WTC CCA WG    |                 |
| PLVA20F                 | GGA TYG GAC CTG AAG AAG GAG AAA TG    | 6281            |
| PLVA20R                 | CAT TTC TCC TTC TTC AGG TCC RAT CC    |                 |
| PLVA21F                 | GCT ATA GAT CCT CCT TGG GTK ATT CC    | 6766            |
| PLVA21R                 | GGA ATA AYC CAA GGD GGA TCT AWA GC    |                 |
| PLVA22F                 | TGT TCA GGR ATA CCG GGA GTA GAT       | 7450            |
| PLVA22R                 | ATC TAC TCC CGG TAT YCC TGA ACA       |                 |
| envfw201 <sup>1</sup>   | TTT CTC ATG TTC CTT GAA TGG TAC       | 7761            |
| envfw202 <sup>1</sup>   | TGG TAC ATT CTG GGT GTT TAA ATC       | 7779            |
| PLVA23F                 | GTC ACT GCT GGR ATG ATW GGG           | 8047            |
| PLVA23R                 | CCC WAT CAT YCC AGC AGT GAC           |                 |
| PLVA24F                 | GCA CTG CAG CCC TGR CGG TAT C         | 8078            |
| PLVA24R                 | GAT ACC GYC AGG GCT GCA GTG C         |                 |
| PLVA25F                 | GCG ACT CAA WGA GWT AAT GCT CC        | 8103            |
| PLVA25R                 | GGA GCA TTA WCT CWT TGA GTC GC        |                 |
| PLVA26F                 | GGA TTG TTC AGA GGA GAC TGC           | 8165            |
| PLVA26R                 | GCA GTC TCC TCT GAA CAA TCC           |                 |
| PLVA27F                 | CAG AGG AGA CTG CAA GAT GCA G         | 8173            |
| PLVA27R                 | CTG CAT CTT GCA GTC TCC TCT G         |                 |
| envrv201 <sup>1</sup>   | GCA TCA GAG AGT GAC CAA AAT AG        | 8214            |
| envrv202 <sup>1</sup>   | CAA TAC CAA TTA AGT GGA ATG TG        | 8254            |
| PLVA28R                 | CTT CCC AGT CCA CCC TTT CTT CTT       | 8773            |
| PLVA29R                 | TGC GGT TTR CGG TTA AGC TAG TT        | 8889            |
| PLVA30R                 | TCT TAT TGT CAT TTC TAT AGG ATG TGG   | 8920            |
| PLVA31R                 | CTC TTT ATT AAA GCA TAC CTG AGG ATC T | 8997            |
| PLVA32R                 | CAG GCA GCC ACC AAG GTT CAC           | 9033            |

Table A2 continued

| <b>PLVB</b>   |                                     |                 |
|---------------|-------------------------------------|-----------------|
| <u>Primer</u> | <u>Sequence</u>                     | <u>Location</u> |
| PLVB1F        | CTA GCT TTR RCC RYA AAC CGC AAR T   | 51              |
| PLVB2F        | CAG RCT GYC CCT CAG GTA GAA TAA A   | 201             |
| PLVB3F        | AAC CCT GAC WTC TGC CTG AGA         | 240             |
| PLVB4F        | TCT TAT GTG GGT CTA AGG RAT CCG     | 268             |
| PLVB5F        | CCC AGT CAA GAG TAA GGC TTG GTA G   | 367             |
| PLVB5R        | CTA CCA AGC CTT ACT CTT GAC TGG G   |                 |
| PLVB6F        | CTT GGT TGA AGA GAC ACT GRC TG      | 447             |
| PLVB6R        | CAG YCA GTG TCT CTT CAA CCA AG      |                 |
| PLVB7F        | CTT CAC GGA TCW TCA AGC CAG         | 565             |
| PLVB7R        | CTG GCT TGA WGA TCC GTG AAG         |                 |
| PLVB8F        | CTG TCT GTC ATG GGG AAT GAG T       | 630             |
| PLVB8R        | ACT CAT TCC CCA TGA CAG ACA G       |                 |
| PLVB9F        | TTG CCT TGG TAG CTA CAG GAC         | 760             |
| PLVB9R        | GTC CTG TAG CTA CCA AGG CAA         |                 |
| PLVB10F       | ACA GCT TTC AAY CCT AGA ACA GTA GC  | 1074            |
| PLVB11F       | AGA RGG AAT ACA TAG TGA AGA RGC CAT | 1119            |
| PLVB11R       | ATG GCY TCT TCA CTA TGT ATT CCY TCT |                 |
| PLVB12F       | ATA CAT AGT GAA GAA GCC ATT CTG     | 1128            |
| PLVB12R       | CAG AAT GGC TTC TTC ACT ATG TAT     |                 |
| PLVB13F       | TGT CAG CTC CAG GAT GTG CT          | 1207            |
| PLVB13R       | AGC ACA TCC TGG AGC TGA CA          |                 |
| PLVB14F       | CCA GAG AAA TCA AAT GCA GGT         | 1943            |
| PLVB14R       | ACC TGC ATT TGA TTT CTC TGG         |                 |
| PLVB15F       | CGT GTT GAG GCC TGG ATA AAT G       | 2054            |
| PLVB15R       | CAT TWA TCC AGG CCT CAA CWC G       |                 |
| PLVB16F       | ACA GAA AAY GAA GGA ARA TGT TGT AA  | 2240            |
| PLVB16R       | TTA CAA CAT YTT CCT TCR TTT TCT GT  |                 |
| PLVB17F       | TTC TGC TGA TAA TGG CCA TTG TT      | 2427            |
| PLVB17R       | AAC AAT GGC CAT TAT CAG CAG AA      |                 |

Table A2 continued

| <b>PLVB (continued)</b> |                                        |                 |
|-------------------------|----------------------------------------|-----------------|
| <u>Primer</u>           | <u>Sequence</u>                        | <u>Location</u> |
| PLVB18F                 | GAT TTG AAA CWC CAG ARG ATA AGC T      | 3000            |
| PLVB18R                 | AGC TTA TCY TCT GGW GTT TCA AAT C      |                 |
| PLVB19F                 | AAT TGG GCM ACT CAA ATA ATA GG         | 3155            |
| PLVB19R                 | CCT ATT ATT TGA GTK GCC CAA TT         |                 |
| PLVB20F                 | GCA AAT WAT GGA RAT AGA AGG ATC TAA TC | 3772            |
| PLVB20R                 | GAT TAG ATC CTT CTA TYT CCA TWA TTT GC |                 |
| PLVB21F                 | CCT TAT GGA ARG AGA TTA TAG AAG A      | 3921            |
| PLVB21R                 | TCT TCT ATA ATC TCY TTC CAT AAG G      |                 |
| PLVB22F                 | CCW GGA AAT AAR GAA ATW GAT GA         | 4001            |
| PLVB22R                 | TCA TCW ATT TCY TTA TTT CCW GG         |                 |
| PLVB23F                 | AAA GGW TTA GAT GTV YTA GGA GGA GT     | 4220            |
| PLVB23R                 | ACT CCT CCT ARB ACA TCT AAW CCT TT     |                 |
| PLVB24F                 | ACA AGG GTT TGG RAG YAC AGG            | 4411            |
| PLVB24R                 | CCT GTR CTY CCA AAC CCT TGT            |                 |
| PLVB25F                 | ATA GAT TGY ACA CAT WTA GAA GGA CA     | 4646            |
| PLVB25R                 | TGT CCT TCT AWA TGT GTR CAA TCT AT     |                 |
| PLVB26F                 | AGT RGA AAC TTT ACA RGC RGC AGT AG     | 4961            |
| PLVB26R                 | CT ACT GCT GCY TGT AAW GTT TCY ACT TC  |                 |
| PLVB27F                 | GAA TTA GTA GCA GGR ACA GGR C          | 5493            |
| PLVB27R                 | GGY CCT GTY CCT GCT ACT AAT TC         |                 |
| PLVB28F                 | TCY TGG TAT TGT AAA CCT YCT TAC AGG    | 5880            |
| PLVB28R                 | YCT GTA AGG RGG TTT ACA ATA CCA        |                 |
| PLVB29F                 | TTA GAA TTT GAR GAR GCA ATA GA         | 6122            |
| PLVB29R                 | TCT ATT GCY TCY TCA AAT TCT AA         |                 |
| PLVB30F                 | GAG AAG ATC ARA GRA TCC CWT CAG GAA    | 6362            |
| PLVB30R                 | TTC CTG AWG GGA TYC TYT GAT CTT CTC    |                 |
| PLVB31F                 | ACA AAT RCT GGA AGG AGG TGA GTT        | 6474            |
| PLVB31R                 | AAC TCA CCT CCT TCC AGY ATT TGT        |                 |

Table A2 continued

| <b>PLVB (continued)</b> |                                       |                 |
|-------------------------|---------------------------------------|-----------------|
| <u>Primer</u>           | <u>Sequence</u>                       | <u>Location</u> |
| PLVB32F                 | TGG AGT RTD GCT TGG TGG ACA TG        | 7012            |
| PLVB32R                 | CAT GTC CAC CAA GCH AYA CTC CA        |                 |
| PLVB33F                 | GAG AAA TAT GCA CTC AGC CRA CT        | 7562            |
| PLVB33R                 | AGT YGG CTG AGT GCA TAT TTC TC        |                 |
| PLVB34F                 | ATG AAT AAT GCA TCT TGG AAT TGG       | 7855            |
| PLVB34R                 | CCA ATT CCA AGA TGC ATT ATT CAT       |                 |
| PLVB35F                 | ACC TCG GTG GCA GGG CTG ATA           | 8080            |
| PLVB35R                 | TAT CAG CCC TGC CAC CGA GGT           |                 |
| PLVB36F                 | TGG CRG GGC TGA TAG GAG CA            | 8087            |
| PLVB36R                 | TGC TCC TAT CAG CCC YGC CA            |                 |
| PLVB37F                 | ACC ACT GGC ACC ACG GCC TT            | 8107            |
| PLVB37R                 | AAG GCC GTG GTG CCA GTG GT            |                 |
| PLVB38F                 | CTC AGA ACY TAA GAG GGA TTA TGC T     | 8135            |
| PLVB38R                 | AGC ATA ATC CCT CTT ARG TTC TGA G     |                 |
| PLVB39F                 | CAA ACA GAR ATA GAT GAG CAA ACC TT    | 8164            |
| PLVB39R                 | AAG GTT TGC TCA TCT ATY TCT GTT TG    |                 |
| PLVB40F                 | ATG GCM AAT CTG ATA GAA ATA AAA GAA G | 8641            |
| PLVB40R                 | CTT CTT TTA TTT CTA TCA GAT TKG CCA T |                 |
| PLVB41R                 | CAT YCC TCC CAG TCY ACC CTT           | 8777            |
| PLVB42R                 | CGC AYT TGC GGT TTR YGG YYA AGC TAG   | 8837            |
| PLVB43R                 | TTT ATT CTA CCT GAG GGR CAG           | 8991            |
| PLVB44R                 | TCT CAG GCA GAW GTC AGG GTT           | 9026            |
| PLVB45R                 | CGG ATY CCT TAG ACC CAC ATA AG        | 9054            |

| <b>PLVA AND PLVB</b> |                                         |                 |
|----------------------|-----------------------------------------|-----------------|
| <u>Name</u>          | <u>Sequence</u>                         | <u>Location</u> |
| PLV330F              | GCA GTT GGC GCC CGA ACA G               | 309             |
| PLV330R              | CCT GTT CGG GCG CCA ACT G               |                 |
| FIV P1F <sup>2</sup> | TGG CCW YTA WCW AAT GAA AAR ATW GAA     | 2457            |
| FIV P2F <sup>2</sup> | TGA AAA RAT WGA AGC HTT AAC AGA MAT AG  | 2471            |
| FIV P1R <sup>2</sup> | GTA ATT TRT CTT CHG GNG TYT CAA ATC CCC | 3019            |
| FIV P2R <sup>2</sup> | GTA TTY TCT GCY TTT TTC TTY TGT CTA     | 3569            |

Table A3: Detailed genetic diversity, natural selection, and recombination results for all viral proteins studied.

| Viral protein  | Protein Length (amino acids) |                  | Pairwise Identity |             | % Invariant Sites |             | Recombination Breakpoints <sup>1</sup> |                        | Sites Under + Selection <sup>2</sup> |                 | Sites Under - Selection <sup>2</sup> |                    |
|----------------|------------------------------|------------------|-------------------|-------------|-------------------|-------------|----------------------------------------|------------------------|--------------------------------------|-----------------|--------------------------------------|--------------------|
|                | PLVA                         | PLVB             | PLVA              | PLVB        | PLVA              | PLVB        | PLVA                                   | PLVB                   | PLVA                                 | PLVB            | PLVA                                 | PLVB               |
| <b>Gag</b>     | <b>479-485</b>               | <b>461-462</b>   | <b>91.5</b>       | <b>94.9</b> | <b>77.0</b>       | <b>80.8</b> |                                        |                        | <b>4 (0.8)</b>                       | <b>8 (1.7)</b>  | <b>257 (53.0)</b>                    | <b>222 (48.1)</b>  |
| MA             | 136                          | 134              | 89.2              | 94.9        | 72.1              | 77.6        |                                        |                        | 2 (1.5)                              | 4 (3.0)         | 66 (48.5)                            | 52 (38.8)          |
| CA             | 234                          | 232              | 96.3              | 98.9        | 88.5              | 90.9        | 905                                    |                        | 0                                    | 0               | 144 (61.5)                           | 132 (56.9)         |
| NC             | 83-90                        | 78-79            | 83.3              | 84.5        | 58.1              | 58.8        | 1368                                   | 1262*                  | 2 (2.2)                              | 4 (5.1)         | 38 (41.3)                            | 31 (39.2)          |
| post-NC        | 22-25                        | 17               | 90.4              | 87.4        | 72.0              | 70.6        | 1820                                   |                        | 0                                    | 0               | 9 (39.1)                             | 7 (41.2)           |
| <b>Pol</b>     | <b>1135-1140<sup>3</sup></b> | <b>1142-1146</b> | <b>88.2</b>       | <b>89.7</b> | <b>67.2</b>       | <b>64.4</b> |                                        |                        | <b>17 (1.4)</b>                      | <b>14 (1.2)</b> | <b>593 (50.2)</b>                    | <b>591 (51.6)</b>  |
| pre-PR         | 32-34                        | 40-41            | 76.2              | 76.0        | 44.1              | 31.7        |                                        |                        | 4 (11.8)                             | 5 (12.2)        | 2 (5.9)                              | 2 (4.9)            |
| PR             | 119-120                      | 117              | 91.4              | 89.3        | 74.2              | 65.0        | 2128                                   |                        | 4 (3.3)                              | 1 (0.9)         | 64 (53.3)                            | 54 (46.2)          |
| RT             | 442                          | 449              | 88.6              | 90.9        | 67.6              | 67.7        | 2665                                   |                        | 4 (0.9)                              | 5 (1.1)         | 230 (52.0)                           | 250 (55.7)         |
| RNaseH         | 112                          | 112              | 86.0              | 91.4        | 63.4              | 67.0        |                                        |                        | 2 (1.8)                              | 0               | 66 (58.9)                            | 59 (52.7)          |
| dUTPase        | 133                          | 133              | 87.9              | 87.8        | 67.7              | 63.2        | 4207                                   |                        | 1 (0.8)                              | 1 (0.8)         | 74 (55.6)                            | 70 (52.6)          |
| IN             | 297-299                      | 290-294          | 88.4              | 90.0        | 67.6              | 63.3        |                                        | 4696                   | 2 (0.7)                              | 2 (0.7)         | 157 (52.5)                           | 156 (53.1)         |
| <b>Vif</b>     | <b>277</b>                   | <b>232-245</b>   | <b>88.8</b>       | <b>85.7</b> | <b>65.3</b>       | <b>57.4</b> |                                        | 5849                   | <b>5 (1.8)</b>                       | <b>5 (2.0)</b>  | <b>142 (51.4)</b>                    | <b>93 (38.0)</b>   |
| <b>Env</b>     | <b>834-841</b>               | <b>809-813</b>   | <b>83.2</b>       | <b>87.4</b> | <b>55.2</b>       | <b>57.8</b> |                                        |                        | <b>16 (1.9)</b>                      | <b>23 (2.8)</b> | <b>400 (46.9)</b>                    | <b>325 (39.9)</b>  |
| leader         | 172-175                      | 162-165          | 78.3              | 84.5        | 51.4              | 50.3        | 6551, 6758                             | 6529                   | 4 (2.3)                              | 5 (3.0)         | 80 (45.7)                            | 61 (37.0)          |
| SU             | 410-416                      | 425-429          | 86.0              | 88.5        | 57.4              | 59.3        |                                        | 7122, 7633, 7779, 7995 | 8 (1.9)                              | 12 (2.8)        | 219 (51.8)                           | 191 (44.5)         |
| TM             | 249-254                      | 219-220          | 81.8              | 87.3        | 53.3              | 60.5        | 8337*, 8643*                           | 8575                   | 4 (1.6)                              | 6 (2.7)         | 101 (39.6)                           | 73 (33.2)          |
| <b>Overall</b> | <b>2724-2739</b>             | <b>2645-2664</b> | <b>87.2</b>       | <b>89.4</b> | <b>65.1</b>       | <b>64.2</b> | <b>10 breakpoints</b>                  | <b>9 breakpoints</b>   | <b>42 (1.5)</b>                      | <b>50 (1.9)</b> | <b>1392 (50.8)</b>                   | <b>1231 (46.2)</b> |

1 - Numbers represent the nucleotide position in either the PLVA (PLV14) or PLVB (PLV1695) reference sequences. All breakpoints significant at alpha = 0.01 except those labeled with (\*) which are significant at alpha = 0.05.

2 - The number (and %) of sites under selection within each specified genome region.

3 - Numbers do not include a unique 41aa insert in PLV14 RT, which may be an artifact of prolonged cell culture (Langley *et al.*, 1994).

Abbreviations: matrix (MA); capsid (CA), nucleocapsid (NC); protease (PR); reverse transcriptase (RT); deoxy-uridine transferase (dUTPase); integrase (IN); surface (SU); transmembrane (TM)
